# Supplementary material
Source: publisher site journal article supplement (https://www.dovepress.com/article/415292)
Supplement: Supplementary file 1 [file get_supplementary_file.php]

**SUPPLEMENTARY INFORMATION – Search Strategy**

**EMBASE search strategy – 1st December 2020**

| Database | *database management systems/ or *records/ or *registries/ or *International Classification of Diseases/ | |
| --- | --- | --- |
| ("database" or "population-based registry" or "population-based register" or "administrative data*" or "claim* data*" or "utilisation data*" or "link* data*" or "hospital* data*" or "billing data*" or "medical data*" or "patient data*" or "health data*" or "administrative record*" or "claim* record*" or "utilisation record*" or "link* record*" or "hospital* record*" or "billing record*" or "medical record*" or "patient record*" or "health record*" or "clinical code" or "ICD-9" or "ICD-10" or "Read code" or "SNOMED").tw. | |
| Validity | *data accuracy/ or *validation study/ or *validation studies as topic/ or *"sensitivity and specificity"/ or *"predictive value of tests"/ | |
| ("validation" or "validity" or "diagnos* accuracy" or "algorithm" or "positive predictive value" or "negative predictive value" or "sensitivity" or "specificity").tw. | |
| Outcome specific search terms | Cardiovascular outcomes | *Myocardial Infarction/ or "myocardial infarction” or "heart attack" |
|  |  | *atrial fibrillation/ or *tachycardia/ or ("arrythm*" or "tachycard*" or "atrial fibrillation").tw | |
| ("cardiac injury" or "myocardial injury").mp. | |
| *myocarditis/ or "myocarditis".mp. | |
| *vasculitis/ or *systemic vasculitis/ or *vasculitis, central nervous system/ or ("vasculitis" or "vasculopathy" or "vascular injury" or "vascular dysfunction").tw. | |
| Venous thromboembolism | *venous thromboembolism/ or *venous thrombosis/ or *thrombophlebitis/ or *upper extremity deep vein thrombosis/ or *pulmonary embolism/ or ("thromboembolism" or "thrombosis" or "thrombotic" or "thrombotic" or "pulmonary embolism" or "pulmonary thrombosis" or "vein thromb*" or "venous thromb*").tw. | |
| Cerebrovascular outcomes | *"Intracranial Embolism and Thrombosis"/ or *infarction, anterior cerebral artery/ or *infarction, middle cerebral artery/ or *infarction, posterior cerebral artery/ or *ischemic attack, transient/ or ("ischaemic stroke" or "cerebral infarction" or "transient ischaemic attack" or "peripheral arter* thromb*" or "arter* thromb*").tw | |
| Respiratory distress syndrome | *respiratory distress syndrome, adult/ or *acute Lung Injury/ or *severe acute respiratory syndrome/ or "respiratory distress".tw. or "respiratory syndrome".tw. or "acute lung injury".tw. or "hypoxaemia".tw | |
| Pneumonitis | "pneumonitis".mp. | |
| Cytokine release syndrome | ("cytokine release" or "cytokine response" or "cytokine storm").mp | |
| Multiple Organ dysfunction syndrome | *Multiple Organ Failure/ or "multiorgan failure".tw. or "multiorgan dysfunction".tw. or "multiple organ failure".tw. or "multiple organ dysfunction".tw. or "MODS".tw. or "MOF".tw. or "multisystem organ failure".tw. or "multisystem organ dysfunction".tw. | |
| Renal failure | *renal insufficiency/ or *acute kidney injury/ or "kidney injury".tw. or "renal injury".tw. or "kidney failure".tw. or "renal failure".tw. or "kidney dysfunction".tw. or "renal dysfunction".tw. or "end-stage renal disease".tw. or "ESRD".tw. | |

**Medline search strategy – 1st of December 2020**

| Database | *database management systems/ or *records/ or *registries/ or *International Classification of Diseases/ | |
| --- | --- | --- |
| ("database" or "population-based registry" or "population-based register" or "administrative data*" or "claim* data*" or "utilisation data*" or "link* data*" or "hospital* data*" or "billing data*" or "medical data*" or "patient data*" or "health data*" or "administrative record*" or "claim* record*" or "utilisation record*" or "link* record*" or "hospital* record*" or "billing record*" or "medical record*" or "patient record*" or "health record*" or "clinical code" or "ICD-9" or "ICD-10" or "Read code" or "SNOMED").tw. | |
| Validity | *data accuracy/ or *validation study/ or *validation studies as topic/ or *"sensitivity and specificity"/ or *"predictive value of tests"/ | |
| ("validation" or "validity" or "diagnos* accuracy" or "algorithm" or "positive predictive value" or "negative predictive value" or "sensitivity" or "specificity").tw. | |
| Outcome specific search terms | Cardiovascular outcomes | *Myocardial Infarction/ or "myocardial infarction" or "heart attack" |
|  |  | *atrial fibrillation/ or *tachycardia/ or ("arrythm*" or "tachycard*" or "atrial fibrillation").tw. | |
| ("cardiac injury" or "myocardial injury").mp. | |
| *myocarditis/ or "myocarditis".mp. | |
| *vasculitis/ or *systemic vasculitis/ or *vasculitis, central nervous system/ or ("vasculitis" or "vasculopathy" or "vascular injury" or "vascular dysfunction").tw | |
| Venous thromboembolism | *venous thromboembolism/ or *venous thrombosis/ or *thrombophlebitis/ or *upper extremity deep vein thrombosis/ or *pulmonary embolism/ or ("thromboembolism" or "thrombosis" or "thrombotic" or "thrombotic" or "pulmonary embolism" or "pulmonary thrombosis" or "vein thromb*" or "venous thromb*").tw. | |
| Cerebrovascular outcomes | *"Intracranial Embolism and Thrombosis"/ or *infarction, anterior cerebral artery/ or *infarction, middle cerebral artery/ or *infarction, posterior cerebral artery/ or *ischemic attack, transient/ or ("ischaemic stroke" or "cerebral infarction" or "transient ischaemic attack" or "peripheral arter* thromb*" or "arter* thromb*").tw. | |
| Respiratory distress syndrome | *respiratory distress syndrome, adult/ or *acute Lung Injury/ or *severe acute respiratory syndrome/ or "respiratory distress".tw. or "respiratory syndrome".tw. or "acute lung injury".tw. or "hypoxaemia".tw. | |
| Pneumonitis | "pneumonitis".mp. | |
| Cytokine release syndrome | ("cytokine release" or "cytokine response" or "cytokine storm").mp. | |
| Multiple Organ dysfunction syndrome | *Multiple Organ Failure/ or ‘multiorgan failure’.tw. or ‘multiorgan dysfunction’.tw. or ‘multiple organ failure’.tw. or ‘multiple organ dysfunction’.tw. or ‘MODS’.tw. or ‘MOF’.tw. or ‘multisystem organ failure’.tw. or ‘multisystem organ dysfunction’.tw. | |
| Renal failure | *renal insufficiency/ or *acute kidney injury/ or "kidney injury".tw. or "renal injury".tw. or "kidney failure".tw. or "renal failure".tw. or "kidney dysfunction".tw. or "renal dysfunction".tw. or "end-stage renal disease".tw. or "ESRD".tw. | |
